# Supplementary material for: ThC2@C82versusTh@C84: unexpected formation of triangular thorium carbide cluster inside fullerenes
Source: Royal Society of Chemistry journal article supplement (doi:10.1039/d2sc04846a), 2022-01-01
Supplement: d2sc04846a1.pdf [file d2sc04846a1.pdf]

## Supporting Information

# **ThC<sub>2</sub>@C<sub>82</sub> versus Th@C<sub>84</sub>: Unexpected Formation of Triangular Thorium Carbide Cluster inside Fullerenes**

*Yi Shen,<sup>†a</sup> Xiaojuan Yu,<sup>†b</sup> Qingyu Meng,<sup>a</sup> Yang-Rong Yao,<sup>a</sup> Jochen Autschbach<sup>\*b</sup> and Ning Chen<sup>\*a</sup>*

<sup>a</sup> College of Chemistry, Chemical Engineering and Materials Science, and State Key Laboratory of Radiation Medicine and Protection, Soochow University, Suzhou, Jiangsu 215123, P. R. China

<sup>b</sup> Department of Chemistry, University at Buffalo, State University of New York, Buffalo, NY 14260-3000, United States

<sup>a</sup> E-mail: chenning@suda.edu.cn

<sup>b</sup> E-mail: jochena@buffalo.edu

## Table of Contents

|                                                                                                                                                                          |     |
|--------------------------------------------------------------------------------------------------------------------------------------------------------------------------|-----|
| <b>Synthesis and isolation</b> of $\text{ThC}_2@C_s(6)\text{-C}_{82}$ and $\text{ThC}_2@C_2(5)\text{-C}_{82}$ .....                                                      | S3  |
| <b>Fig. S1.</b> HPLC separation of $\text{ThC}_2@C_s(6)\text{-C}_{82}$ and $\text{ThC}_2@C_2(5)\text{-C}_{82}$ .....                                                     | S4  |
| <b>Fig. S2.</b> Crystal structures of Th-based mono-metallofullerenes .....                                                                                              | S5  |
| <b>Fig. S3.</b> Disordered thorium and carbon positions in $\text{ThC}_2@C_s(6)\text{-C}_{82}$ and $\text{ThC}_2@C_2(5)\text{-C}_{82}$ .....                             | S5  |
| <b>Fig. S4.</b> The relative position of Th1 and Th1A in $\text{ThC}_2@C_s(6)\text{-C}_{82}$ .....                                                                       | S6  |
| <b>Fig. S5.</b> The relative position of Th1 and Th1A in $\text{ThC}_2@C_2(5)\text{-C}_{82}$ .....                                                                       | S6  |
| <b>Fig. S6.</b> Structures of crystallographically characterized mononuclear clusterfullerenes containing symmetry planes .....                                          | S7  |
| <b>Fig. S7.</b> DFT optimized structures of $\text{ThC}_2@C_{82}$ isomers.....                                                                                           | S8  |
| <b>Fig. S8.</b> NLMO isosurfaces and atomic orbital weight compositions for $\text{ThC}_2@C_2(5)\text{-C}_{82}$ in the singlet state .....                               | S9  |
| <b>Fig. S9.</b> NLMO isosurfaces of the carbon cage with Th and atomic orbital weight compositions for $\text{ThC}_2@C_s(6)\text{-C}_{82}$ in the singlet state.....     | S9  |
| <b>Fig. S10.</b> NLMO isosurfaces of the carbon cage with Th and atomic orbital weight compositions for $\text{ThC}_2@C_2(5)\text{-C}_{82}$ in the singlet state .....   | S10 |
| <b>Table S1.</b> Occupancies of disordered thorium sites in $\text{ThC}_2@C_s(6)\text{-C}_{82}$ and $\text{ThC}_2@C_2(5)\text{-C}_{82}$ .....                            | S10 |
| <b>Table S2.</b> Relative energies calculated with different density functionals for $\text{ThC}_2@C_s(6)\text{-C}_{82}$ and $\text{ThC}_2@C_2(5)\text{-C}_{82}$ . ..... | S11 |
| <b>Table S3.</b> Experimental and optimized structural parameters of $\text{ThC}_2@C_s(6)\text{-C}_{82}$ and $\text{ThC}_2@C_2(5)\text{-C}_{82}$ .....                   | S11 |
| <b>Table S4.</b> Crystal structure data of $\text{ThC}_2@C_s(6)\text{-C}_{82}$ and $\text{ThC}_2@C_2(5)\text{-C}_{82}$ .....                                             | S12 |
| <b>References</b> .....                                                                                                                                                  | S13 |
| <b>Optimized xyz coordinates</b> .....                                                                                                                                   | S13 |

**High-performance liquid chromatography (HPLC) separation process of  $\text{ThC}_2@C_s(6)\text{-C}_{82}$  and  $\text{ThC}_2@C_2(5)\text{-C}_{82}$ .** The first stage was performed on a Buckyprep-M column (25 mm  $\times$  250 mm, Cosmosil Nacalai Tesque) with toluene as mobile phase. After that, as shown in Figure S1 (a), fraction from 34 to 36 min (marked in gray) was re-injected into a Buckyprep column (10 mm  $\times$  250 mm, Cosmosil Nacalai Tesque) for the second step separation using toluene as the eluent. The fraction marked in orange, which contained two isomers of  $\text{ThC}_2@C_{82}$  were collected. The third step of separation was conducted on a 5PBB column (10 mm  $\times$  250 mm, Cosmosil Nacalai Tesque) using toluene as the eluent. The fraction marked in green, which contained samples were collected and re-injected into the Buckyprep column with a recycle method in the fourth stage. The fraction marked in red contained  $\text{ThC}_2@C_s(6)\text{-C}_{82}$  and only a small amount of impurities. Meanwhile, the fraction marked in blue, which contained  $\text{ThC}_2@C_2(5)\text{-C}_{82}$  was collected. Figure S1 (b) shows that the MALDI-TOF mass spectrometry of the isolated  $\text{ThC}_2@C_s(6)\text{-C}_{82}$  and  $\text{ThC}_2@C_2(5)\text{-C}_{82}$ .

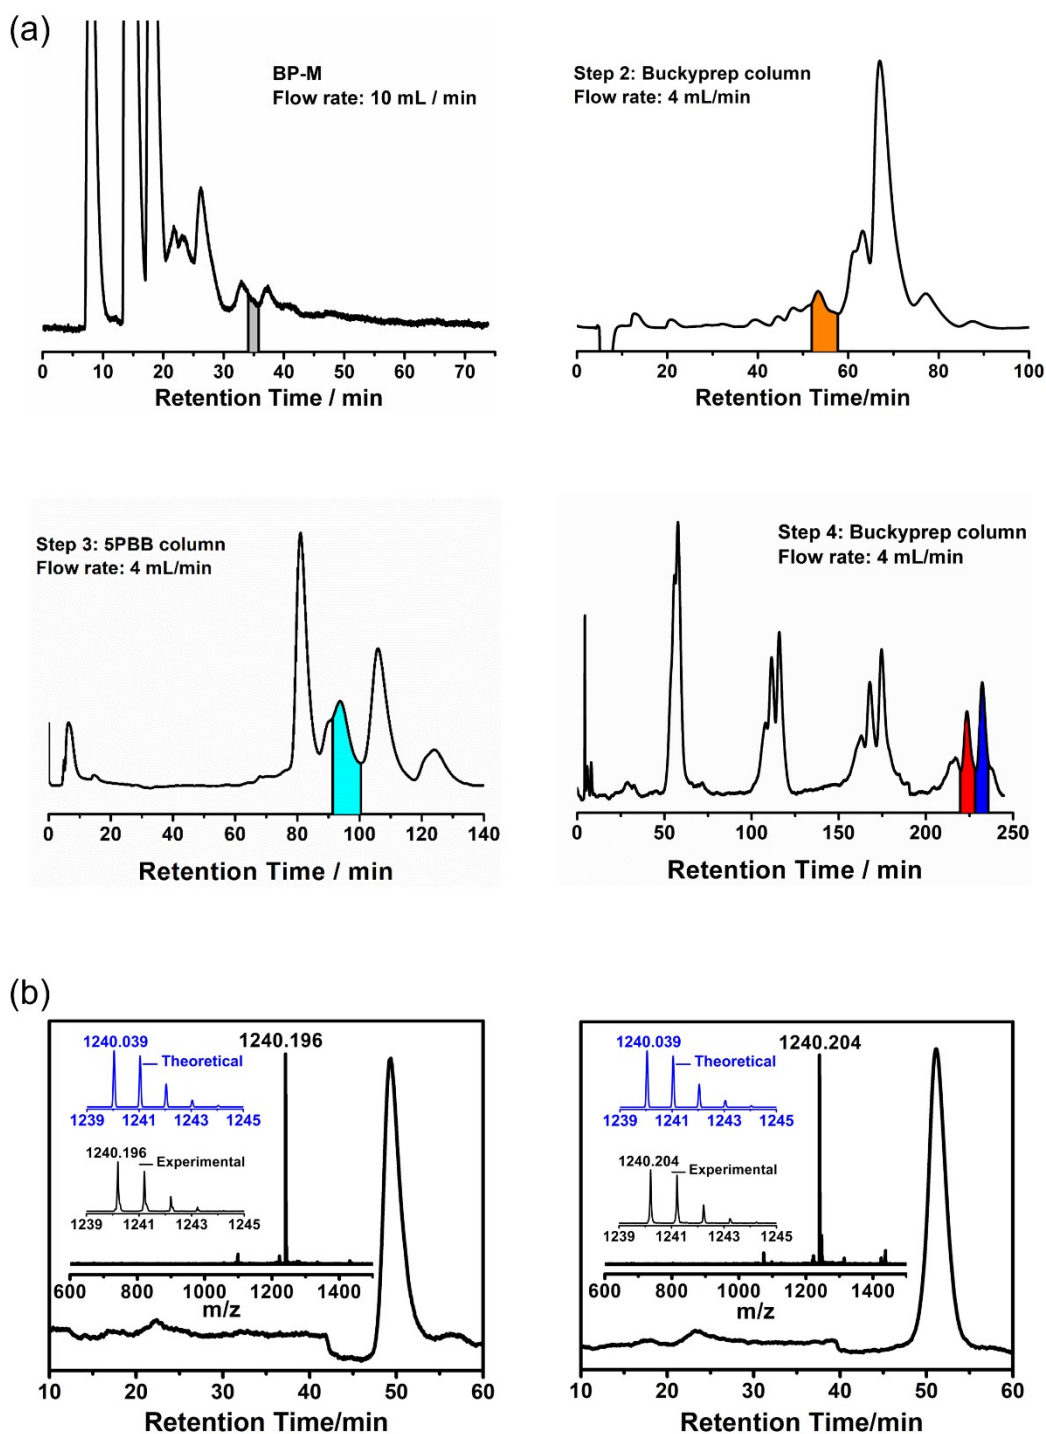

**Fig. S1.** (a) HPLC profiles showing the separation procedures of ThC<sub>2</sub>@C<sub>s</sub>(6)-C<sub>82</sub> and ThC<sub>2</sub>@C<sub>2</sub>(5)-C<sub>82</sub>. (b) HPLC chromatogram of purified ThC<sub>2</sub>@C<sub>s</sub>(6)-C<sub>82</sub>(left) and ThC<sub>2</sub>@C<sub>2</sub>(5)-C<sub>82</sub>(right) on a Buckyprep column with toluene as the eluent. (The insets show the positive-ion mode MALDI-TOF mass spectra and expansions of the corresponding experimental isotopic distributions of ThC<sub>2</sub>@C<sub>s</sub>(6)-C<sub>82</sub> and ThC<sub>2</sub>@C<sub>2</sub>(5)-C<sub>82</sub> in comparison with the theoretical ones.)

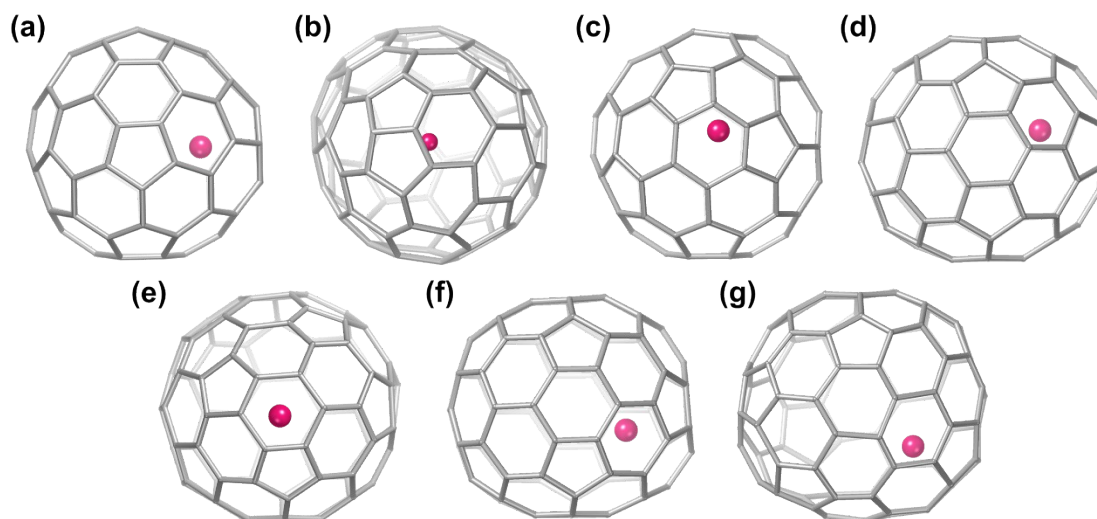

**Fig. S2.** Thorium-containing endohedral metallofullerenes previously published, e.g. a)  $\text{Th}@T_d(19151)\text{-C}_{76}$ ,<sup>1</sup> b)  $\text{Th}@C_1(28324)\text{-C}_{80}$ ,<sup>2</sup> c)  $\text{Th}@D_{5h}(6)\text{-C}_{80}$ ,<sup>3</sup> d)  $\text{Th}@C_{3v}(8)\text{-C}_{82}$ ,<sup>4</sup> e)  $\text{Th}@C_2(5)\text{-C}_{82}$ ,<sup>5</sup> f)  $\text{Th}@C_{2v}(9)\text{-C}_{82}$ ,<sup>5</sup> g)  $\text{Th}@C_1(11)\text{-C}_{86}$ .<sup>6</sup>

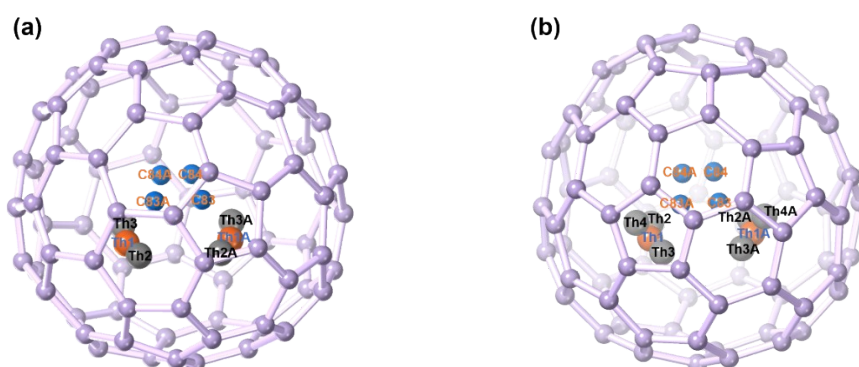

**Fig. S3.** Drawing of all the Th and C disordered sites. (a) drawing of one orientation of  $C_s(6)\text{-C}_{82}$  cage together with all the metal disordered sites, six sites for Th are presented, three disordered sites with fractional occupancies of 0.418(2), 0.0489(15), 0.0326(12) for Th1, Th2, Th3, respectively. Another half of the Th disordered sites (Th1A, Th2A and Th3A, respectively) are generated by mirror plane of the crystal. C83A and C84A are generated from C83 and C84 with fractional occupancies of 0.5. (b) drawing of one orientation of  $C_2(5)\text{-C}_{82}$  cage together with all the Th, C disordered sites, Th1A, Th2A, Th3A and Th4A are generated from Th1, Th2, Th3 and Th4 for which the fractional occupancies are 0.281(3), 0.150(3), 0.0368(17), 0.0327(19), respectively. C83A and C84A are generated from C83 and C84 with fractional occupancies of 0.5.

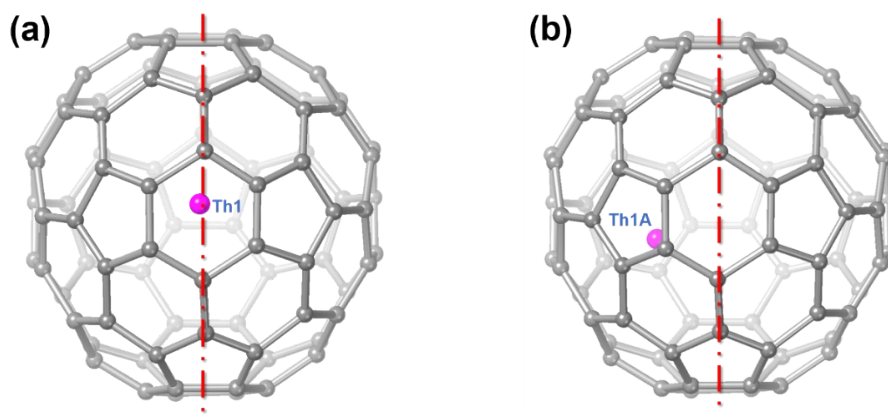

**Fig. S4.** The relationship of the major Th sites (a) Th1 and (b) Th1A with the Symmetry plane (highlighted with the dotted red line) in  $\text{ThC}_2@C_5(6)\text{-C}_{82}$ .

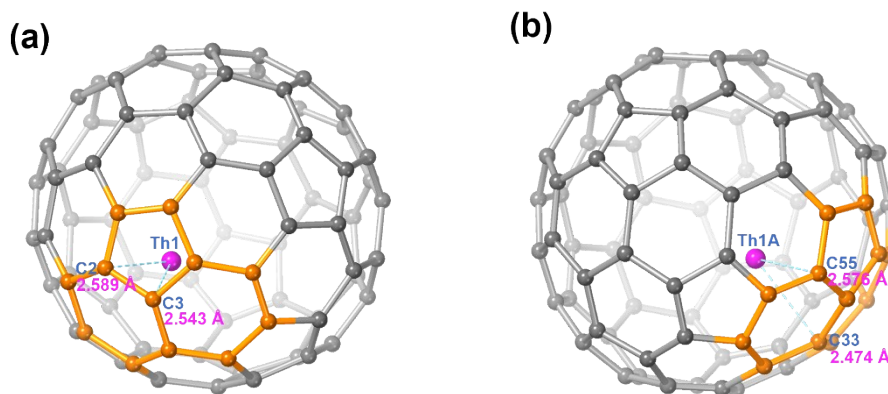

**Fig. S5.** View showing the interaction of the major Th sites (a) Th1 and (b) Th1A with the closest cage in  $\text{ThC}_2@C_2(5)\text{-C}_{82}$ .

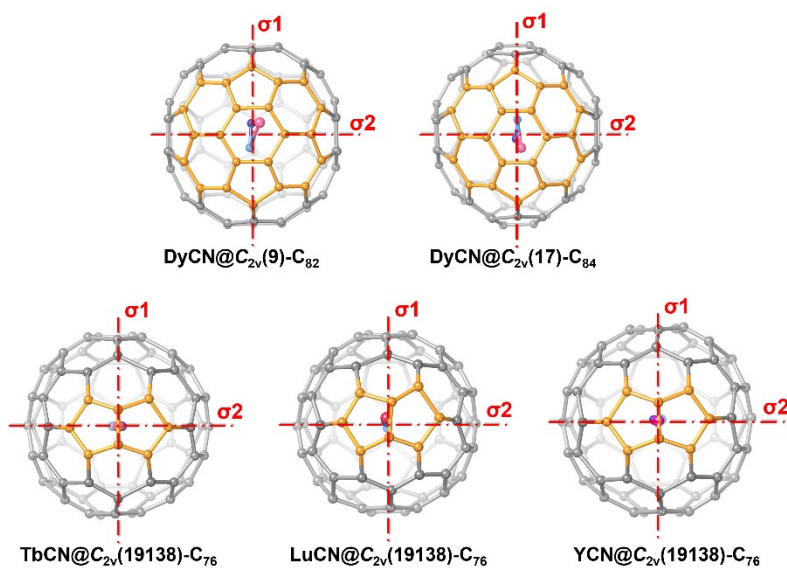

**Fig. S6.** Structures of crystallographically characterized mononuclear clusterfullerenes with pristine  $C_{2v}$  cages that contain two symmetry planes (highlighted with dotted red lines). The fullerene cage segments closest to the encapsulated metal ions are highlighted in light orange.<sup>7-10</sup>

For  $\text{ThC}_2@C_s(6)\text{-C}_{82}$  and  $\text{ThC}_2@C_2(5)\text{-C}_{82}$ , each of the clusterfullerenes had two conformers depending on the  $\text{ThC}_2$  orientation inside the cage, as shown in **Figure S6**, which we labeled **1a/1b** for  $\text{ThC}_2@C_s(6)\text{-C}_{82}$  and **2a/2b** for  $\text{ThC}_2@C_2(5)\text{-C}_{82}$ . Because the spin-triplet states are higher in energy by 20.5 and 12.8 kcal/mol than their corresponding spin-singlet states, respectively, the ground spin states for  $\text{ThC}_2@C_s(6)\text{-C}_{82}$  and  $\text{ThC}_2@C_2(5)\text{-C}_{82}$  are singlets. As seen in Table S2, the global minimum structure is **1a**, which has the lowest energy for all functionals tested. **1b** is 13.5 kcal/mol higher than **1a**; **2a** and **2b** are 2.6 and 10.5 kcal/mol higher in energy than **1a**, respectively. The optimized Th–C distances for **1a** are 2.375 and 2.370 Å, respectively; the two  $\angle\text{Th}\text{--C}\text{--C}$  angles are 76.7 and 74.9°, respectively, in good agreement with the experimental data (76.0 and 75.3°). Therefore, we discuss the chemical bonding of conformers **1a** and **2a** (spin-singlet states) as representatives in the main text.

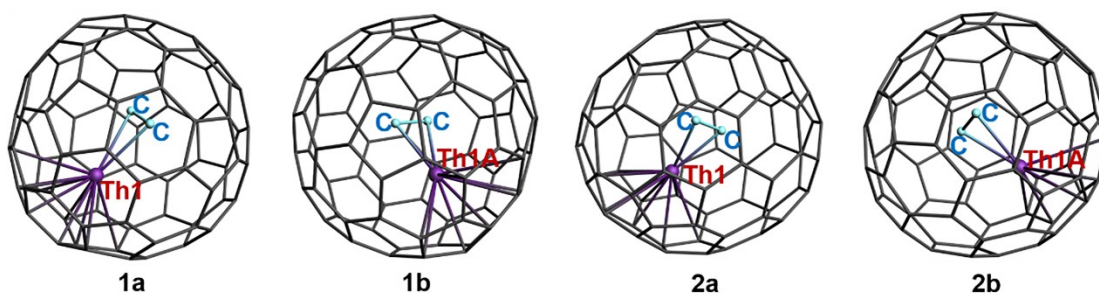

**Fig. S7.** DFT optimized structures of  $\text{ThC}_2@C_s(6)\text{-C}_{82}$  (**1a/1b**) and  $\text{ThC}_2@C_2(5)\text{-C}_{82}$  (**2a/2b**) with different Th sites and two carbon cages in the spin-singlet states.



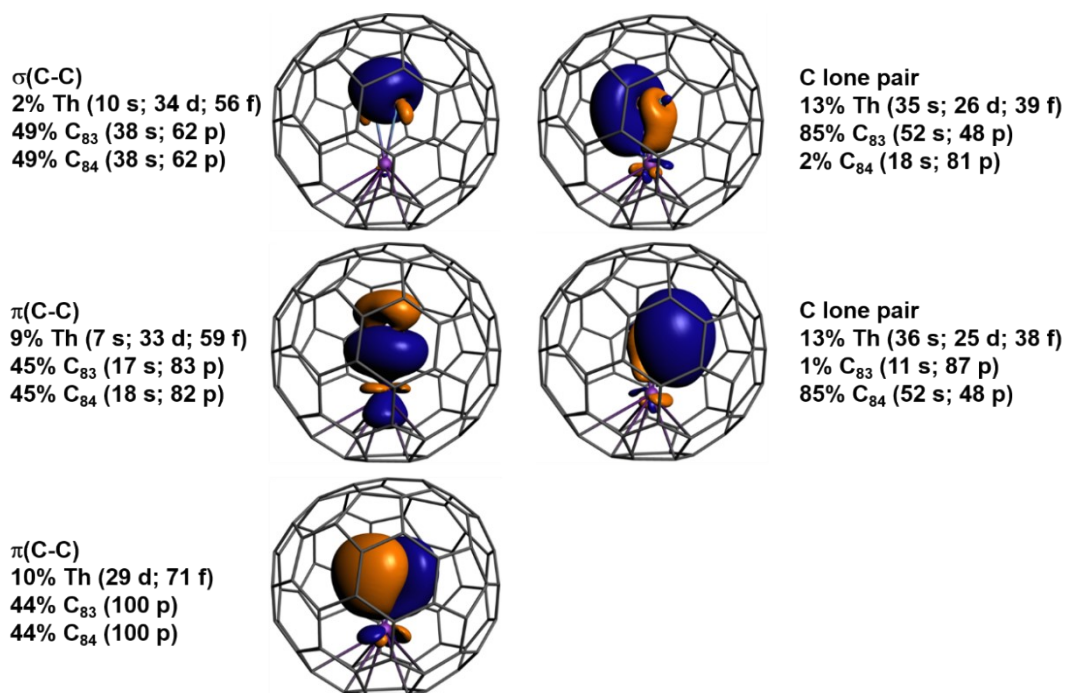

**Fig. S8.** Orbitals isosurfaces ( $\pm 0.03$  au) and atomic orbital weight compositions (in %) obtained from NLMO analysis of the singlet state of ThC<sub>2</sub>@C<sub>2</sub>(5)-C<sub>82</sub> (structure **2a**).

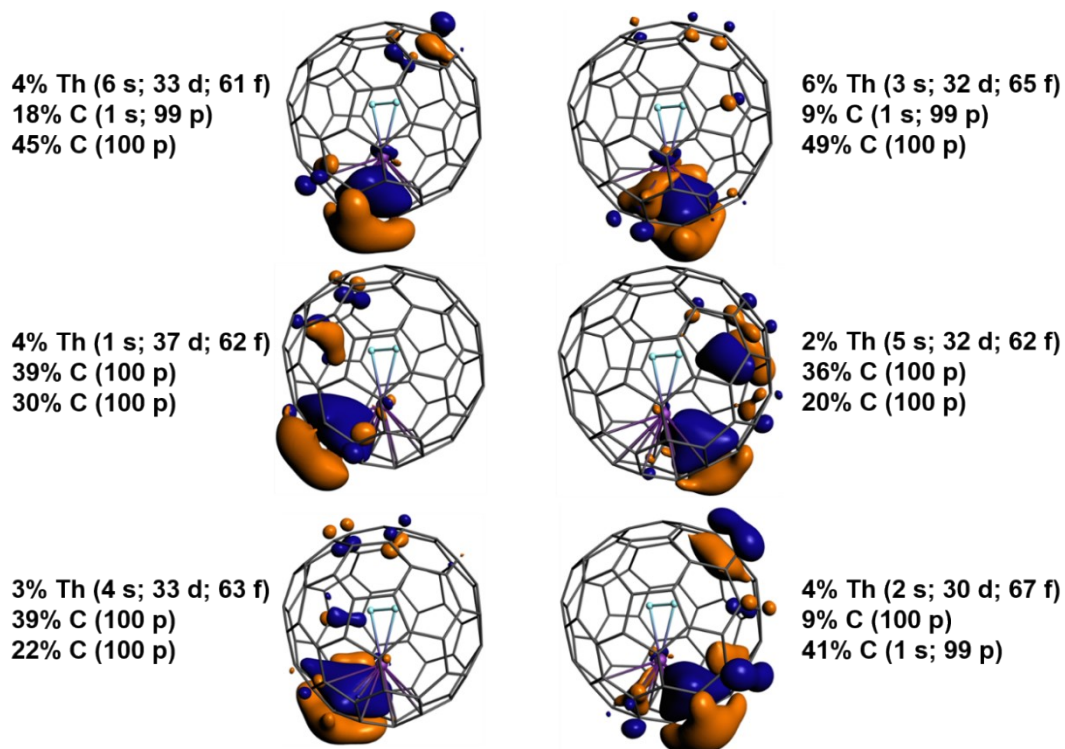

**Fig. S9.** Orbital isosurfaces ( $\pm 0.03$  au) of the carbon cage with Th and atomic orbital weight compositions (in %) obtained from NLMO analysis of the singlet state of ThC<sub>2</sub>@C<sub>s</sub>(6)-C<sub>82</sub> (structure **1a**).

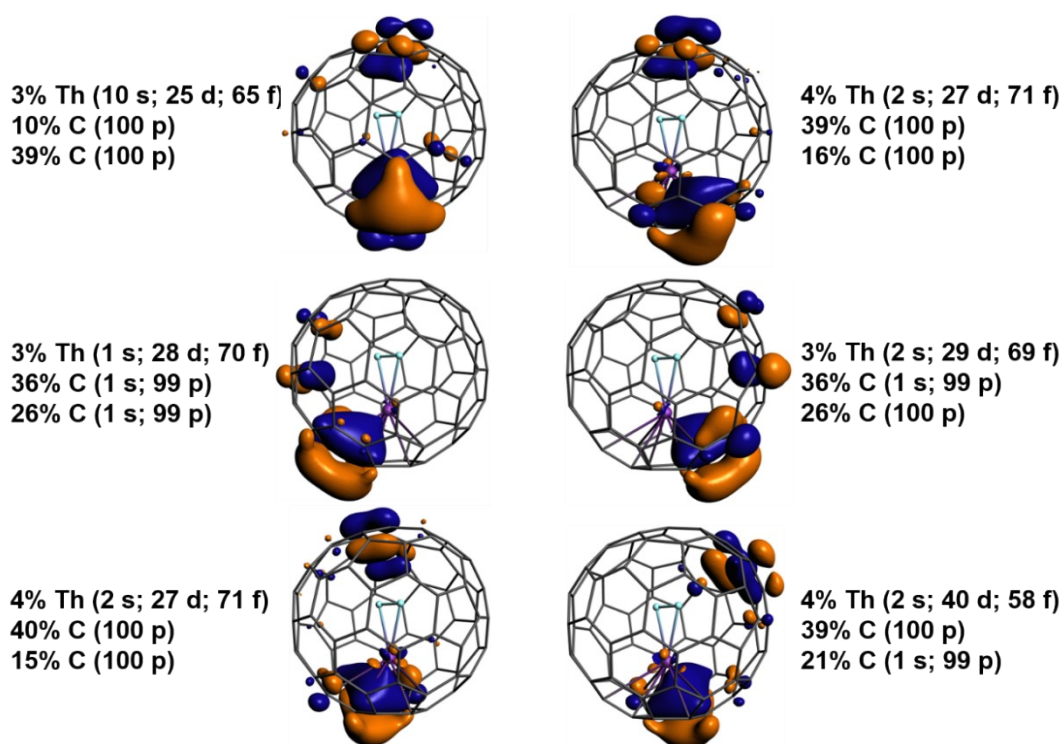

**Fig. S10.** Orbital isosurfaces ( $\pm 0.03$  au) of the carbon cage with Th and atomic orbital weight compositions (in %) obtained from NLMO analysis of the singlet state of  $\text{ThC}_2@C_2(5)-C_{82}$  (structure **2a**).

**Table S1.** Occupancies of disordered thorium sites in two isomers of  $\text{ThC}_2@C_{82}$ .

| Isomer   | Labelling | Occupancy  |
|----------|-----------|------------|
| $C_s(6)$ | Th1       | 0.418(2)   |
|          | Th2       | 0.0489(15) |
|          | Th3       | 0.0326(12) |
| $C_2(5)$ | Th1       | 0.281(3)   |
|          | Th2       | 0.150(3)   |
|          | Th3       | 0.0368(17) |
|          | Th4       | 0.0327(19) |

**Table S2.** Relative energies (kcal/mol) of different isomers of  $\text{ThC}_2@C_s(6)\text{-C}_{82}$  and  $\text{ThC}_2@C_2(5)\text{-C}_{82}$ , calculated with different density functionals.

| Carbide clusterfullerenes           | Sites | PBE  | BP86 | B3LYP | PBE0 |
|-------------------------------------|-------|------|------|-------|------|
| $\text{ThC}_2@C_s(6)\text{-C}_{82}$ | Th1   | 0.0  | 0.0  | 0.0   | 0.0  |
|                                     | Th1A  | 14.3 | 12.2 | 13.5  | 15.4 |
| $\text{ThC}_2@C_2(5)\text{-C}_{82}$ | Th1   | 1.9  | 1.8  | 2.6   | 2.5  |
|                                     | Th1A  | 8.7  | 8.5  | 10.5  | 11.2 |

**Table S3.** Experimental (Expt.) and optimized structural parameters (B3LYP functional) for structures of  $\text{ThC}_2@C_s(6)\text{-C}_{82}$  (**1a**) and  $\text{ThC}_2@C_2(5)\text{-C}_{82}$  (**2a**).

| Distance / Å | $\text{ThC}_2@C_s(6)\text{-C}_{82}$ |         | $\text{ThC}_2@C_2(5)\text{-C}_{82}$ |         |
|--------------|-------------------------------------|---------|-------------------------------------|---------|
|              | Expt.                               | Singlet | Expt.                               | Singlet |
| Th1-C83      | 2.360(11)                           | 2.375   | 2.334(15)                           | 2.367   |
| Th1-C84      | 2.353(10)                           | 2.370   | 2.385(14)                           | 2.369   |
| C83-C84      | 1.168(16)                           | 1.252   | 1.11(2)                             | 1.251   |
| Th1-C1       | 2.546(13)                           | 2.617   | 2.687(17)                           | 2.685   |
| Th1-C2       | 2.558(10)                           | 2.652   | 2.589(13)                           | 2.679   |
| Th1-C3       | 2.675(13)                           | 2.754   | 2.543(13)                           | 2.660   |
| Th1-C4       | 2.736(17)                           | 2.857   | 2.635(13)                           | 2.655   |
| Th1-C5       | 2.694(15)                           | 2.751   | 2.654(15)                           | 2.700   |
| Th1-C6       | 2.626(16)                           | 2.649   | 2.683(18)                           | 2.702   |

**Table S4.** Crystal structure data of ThC<sub>2</sub>@C<sub>s</sub>(6)-C<sub>82</sub> and ThC<sub>2</sub>@C<sub>2</sub>(5)-C<sub>82</sub>.

| Crystal                                               | ThC <sub>2</sub> @C <sub>s</sub> (6)-<br>C <sub>82</sub> ·[Ni <sup>II</sup> (OEP)]·2C <sub>6</sub> H <sub>6</sub> | ThC <sub>2</sub> @C <sub>2</sub> (5)-<br>C <sub>82</sub> ·[Ni <sup>II</sup> (OEP)]·2C <sub>6</sub> H <sub>6</sub> |
|-------------------------------------------------------|-------------------------------------------------------------------------------------------------------------------|-------------------------------------------------------------------------------------------------------------------|
| <b>Formula weight</b>                                 | 1988.55                                                                                                           | 1988.55                                                                                                           |
| <b>Crystal system</b>                                 | monoclinic                                                                                                        | monoclinic                                                                                                        |
| <b>Space group</b>                                    | <i>C2/m</i>                                                                                                       | <i>C2/m</i>                                                                                                       |
| <b><i>a</i>, Å</b>                                    | 25.3169(18)                                                                                                       | 25.261(2)                                                                                                         |
| <b><i>b</i>, Å</b>                                    | 15.0051(11)                                                                                                       | 14.9722(11)                                                                                                       |
| <b><i>c</i>, Å</b>                                    | 19.9071(15)                                                                                                       | 19.9879(17)                                                                                                       |
| <b><i>α</i>, deg</b>                                  | 90                                                                                                                | 90                                                                                                                |
| <b><i>β</i>, deg</b>                                  | 94.325(3)                                                                                                         | 94.646(4)                                                                                                         |
| <b><i>γ</i>, deg</b>                                  | 90                                                                                                                | 90                                                                                                                |
| <b>Volume, Å<sup>3</sup></b>                          | 7540.8(10)                                                                                                        | 7534.8(10)                                                                                                        |
| <b><i>Z</i></b>                                       | 4                                                                                                                 | 4                                                                                                                 |
| <b><i>T</i>, K</b>                                    | 120(2)                                                                                                            | 120(2)                                                                                                            |
| <b>Radiation (<i>λ</i>, Å)</b>                        | 1.34138                                                                                                           | 1.34138                                                                                                           |
| <b>Unique data<br/>(<i>R</i><sub>int</sub>)</b>       | 7836 (0.0813)                                                                                                     | 9317 (0.0590)                                                                                                     |
| <b>Parameters</b>                                     | 1064                                                                                                              | 1062                                                                                                              |
| <b>Observed data<br/>(<i>I</i> &gt; 2σ(<i>I</i>))</b> | 6330                                                                                                              | 7692                                                                                                              |
| <b><i>R</i><sub>1</sub> (observed<br/>data)</b>       | 0.0567                                                                                                            | 0.0773                                                                                                            |
| <b>w<i>R</i><sub>2</sub> (all data)</b>               | 0.1474                                                                                                            | 0.2230                                                                                                            |
| <b>CCDC NO.</b>                                       | 2183932                                                                                                           | 2183933                                                                                                           |

## REFERENCES

- 1 M. Jin, J. Zhuang, Y. Wang, W. Yang, X. Liu and N. Chen, *Inorg. Chem.*, 2019, **58**, 16722-16726.
- 2 W. Cai, L. Abella, J. Zhuang, X. Zhang, L. Feng, Y. Wang, R. Morales-Martinez, R. Esper, M. Boero, A. Metta-Magana, A. Rodriguez-Fortea, J. M. Poblet, L. Echegoyen and N. Chen, *J. Am. Chem. Soc.*, 2018, **140**, 18039-18050.
- 3 Y. Yan, R. Morales-Martinez, J. Zhuang, Y. R. Yao, X. Li, J. M. Poblet, A. Rodriguez-Fortea and N. Chen, *Chem Commun (Camb)*, 2021, **57**, 6624-6627.
- 4 Y. Wang, R. Morales-Martinez, X. Zhang, W. Yang, Y. Wang, A. Rodriguez-Fortea, J. M. Poblet, L. Feng, S. Wang and N. Chen, *J. Am. Chem. Soc.*, 2017, **139**, 5110-5116.
- 5 Q. Meng, R. Morales-Martinez, J. Zhuang, Y. R. Yao, Y. Wang, L. Feng, J. M. Poblet, A. Rodriguez-Fortea and N. Chen, *Inorg. Chem.*, 2021, **60**, 11496-11502.
- 6 Y. Wang, R. Morales-Martinez, W. Cai, J. Zhuang, W. Yang, L. Echegoyen, J. M. Poblet, A. Rodriguez-Fortea and N. Chen, *Chem Commun (Camb)*, 2019, **55**, 9271-9274.
- 7 J. Xin, F. Jin, R. Guan, M. Chen, X.-M. Xie, Q. Zhang, S.-Y. Xie and S. Yang, *Inorg. Chem. Front.*, 2021, **8**, 1719-1726.
- 8 W. Shen, Z. Hu, P. Yu, Z. Wei, P. Jin, Z. Shi and X. Lu, *Inorg. Chem. Front.*, 2020, **7**, 4563-4571.
- 9 F. Liu, S. Wang, C.-L. Gao, Q. Deng, X. Zhu, A. Kostanyan, R. Westerström, F. Jin, S.-Y. Xie, A. A. Popov, T. Greber and S. Yang, *Angew. Chem. Int. Ed.*, 2017, **56**, 1830-1834.
- 10 R. Guan, M. Chen, J. Xin, X.-M. Xie, F. Jin, Q. Zhang, S.-Y. Xie and S. Yang, *J. Am. Chem. Soc.*, 2021, **143**, 8078-8085.

## Optimized xyz coordinates

Structure **1a** Bond Energy: -19270.15 kcal/mol

|   |           |           |           |
|---|-----------|-----------|-----------|
| C | 50.324430 | 26.510183 | 55.209046 |
| C | 49.272598 | 27.436266 | 55.583004 |
| C | 48.331631 | 27.955642 | 54.600742 |
| C | 48.366817 | 27.554700 | 53.222295 |
| C | 49.412520 | 26.645386 | 52.846824 |
| C | 50.362777 | 26.115558 | 53.814219 |
| C | 51.632932 | 26.017064 | 53.113284 |
| C | 52.901040 | 26.186726 | 53.759486 |
| C | 52.865283 | 26.521015 | 55.148705 |

|   |           |           |           |
|---|-----------|-----------|-----------|
| C | 51.598520 | 26.729934 | 55.829153 |
| C | 51.837765 | 27.768223 | 56.817110 |
| C | 50.817758 | 28.715318 | 57.141880 |
| C | 49.554194 | 28.539216 | 56.487954 |
| C | 48.800549 | 29.680239 | 56.078525 |
| C | 48.053576 | 29.328298 | 54.915976 |
| C | 47.677160 | 30.304884 | 53.942341 |
| C | 47.490857 | 29.820235 | 52.625114 |
| C | 47.932177 | 28.486850 | 52.257770 |
| C | 48.530719 | 28.558194 | 50.937259 |
| C | 49.711563 | 27.835662 | 50.639797 |
| C | 50.095454 | 26.849940 | 51.600866 |
| C | 51.456073 | 26.456616 | 51.766924 |
| C | 52.510445 | 27.023789 | 50.988491 |
| C | 53.788772 | 27.027698 | 51.598908 |
| C | 53.972687 | 26.657928 | 52.978568 |
| C | 54.976953 | 27.535014 | 53.556469 |
| C | 54.885209 | 27.945517 | 54.910826 |
| C | 53.836807 | 27.388139 | 55.715143 |
| C | 53.201022 | 28.159970 | 56.747331 |
| C | 53.592604 | 29.514443 | 57.009261 |
| C | 52.592519 | 30.429027 | 57.427290 |
| C | 51.197494 | 30.026398 | 57.484036 |
| C | 50.384343 | 31.159986 | 57.125979 |
| C | 49.216643 | 31.021982 | 56.336023 |
| C | 48.859137 | 32.046137 | 55.364296 |
| C | 48.079565 | 31.693299 | 54.168057 |
| C | 48.212008 | 32.509512 | 53.020157 |
| C | 48.059764 | 31.987558 | 51.690572 |
| C | 47.700889 | 30.667264 | 51.493277 |

|   |           |           |           |
|---|-----------|-----------|-----------|
| C | 48.341575 | 29.889671 | 50.453307 |
| C | 49.312629 | 30.466780 | 49.656623 |
| C | 50.498411 | 29.734391 | 49.308564 |
| C | 50.759653 | 28.440481 | 49.817459 |
| C | 52.161912 | 28.037281 | 50.002402 |
| C | 53.169454 | 28.975783 | 49.679831 |
| C | 54.416200 | 29.030932 | 50.393266 |
| C | 54.727762 | 28.074916 | 51.323257 |
| C | 55.422240 | 28.430490 | 52.542781 |
| C | 55.743244 | 29.780440 | 52.828169 |
| C | 55.769032 | 30.140029 | 54.204380 |
| C | 55.329169 | 29.255641 | 55.217331 |
| C | 54.680004 | 30.043440 | 56.270941 |
| C | 54.724056 | 31.408207 | 55.900545 |
| C | 53.662800 | 32.305299 | 56.205419 |
| C | 52.644739 | 31.801700 | 57.051954 |
| C | 51.278073 | 32.262074 | 56.923888 |
| C | 50.951616 | 33.236019 | 56.017877 |
| C | 49.713237 | 33.170906 | 55.290977 |
| C | 49.950666 | 33.846149 | 54.050067 |
| C | 49.223458 | 33.533413 | 52.943553 |
| C | 49.845619 | 33.499833 | 51.632481 |
| C | 49.064691 | 32.600047 | 50.843120 |
| C | 49.676627 | 31.857221 | 49.849819 |
| C | 51.081089 | 32.000050 | 49.627019 |
| C | 51.551651 | 30.707336 | 49.163913 |
| C | 52.846060 | 30.331624 | 49.349466 |
| C | 53.771122 | 31.222978 | 50.014257 |
| C | 54.768567 | 30.419603 | 50.634727 |
| C | 55.391928 | 30.808045 | 51.842374 |

|    |           |           |           |
|----|-----------|-----------|-----------|
| C  | 55.067623 | 32.112841 | 52.299491 |
| C  | 55.081307 | 32.430596 | 53.712351 |
| C  | 55.421003 | 31.481236 | 54.631283 |
| C  | 54.023877 | 33.379429 | 53.993829 |
| C  | 53.310686 | 33.333789 | 55.220862 |
| C  | 51.979337 | 33.804998 | 55.162950 |
| C  | 51.359691 | 34.150112 | 53.929168 |
| C  | 52.017498 | 33.995488 | 52.680371 |
| C  | 51.246272 | 33.604932 | 51.491532 |
| C  | 51.893844 | 32.818857 | 50.440433 |
| C  | 53.304242 | 32.433392 | 50.591338 |
| C  | 54.030503 | 32.880908 | 51.712080 |
| C  | 53.384356 | 33.665125 | 52.760998 |
| C  | 51.390593 | 30.711215 | 52.742074 |
| C  | 52.382790 | 30.503862 | 53.476371 |
| Th | 50.885050 | 28.713793 | 53.914198 |

**Structure 2a** Bond Energy: -19267.56 kcal/mol

|   |           |           |           |
|---|-----------|-----------|-----------|
| C | 22.237323 | -2.602812 | 16.146309 |
| C | 22.217195 | -2.155544 | 14.771978 |
| C | 21.206400 | -2.612343 | 13.828926 |
| C | 20.118816 | -3.484468 | 14.241951 |
| C | 20.136890 | -3.925735 | 15.617928 |
| C | 21.189342 | -3.527404 | 16.539577 |
| C | 20.581542 | -3.377207 | 17.837795 |
| C | 21.061111 | -2.463356 | 18.831722 |
| C | 22.135693 | -1.615527 | 18.466842 |
| C | 22.665162 | -1.656395 | 17.110791 |
| C | 23.054902 | -0.299549 | 16.766894 |
| C | 22.481282 | -0.761504 | 14.474763 |



|   |           |           |           |
|---|-----------|-----------|-----------|
| C | 21.702539 | -0.378808 | 13.349639 |
| C | 20.909975 | -1.499875 | 12.959383 |
| C | 19.631366 | -1.295863 | 12.343129 |
| C | 18.595140 | -2.197167 | 12.691248 |
| C | 18.839133 | -3.236589 | 13.682877 |
| C | 17.602263 | -3.408883 | 14.426853 |
| C | 17.612558 | -3.670166 | 15.818137 |
| C | 18.900544 | -3.963307 | 16.375968 |
| C | 19.186658 | -3.659031 | 17.733670 |
| C | 18.215190 | -3.097732 | 18.624927 |
| C | 18.727224 | -2.357856 | 19.712616 |
| C | 20.131814 | -1.983894 | 19.778787 |
| C | 22.211698 | -0.280914 | 18.954354 |
| C | 16.896661 | -0.384868 | 12.606764 |
| C | 17.247824 | -1.754214 | 12.804390 |
| C | 16.629461 | -2.538580 | 13.843171 |
| C | 15.650308 | -1.991510 | 14.646362 |
| C | 15.588532 | -2.317518 | 16.039695 |
| C | 16.589850 | -3.088339 | 16.679985 |
| C | 16.887774 | -2.805413 | 18.093012 |
| C | 16.155276 | -1.780871 | 18.738637 |
| C | 16.716415 | -0.998467 | 19.800887 |
| C | 15.257684 | -0.608589 | 14.460373 |
| C | 15.011128 | -1.171326 | 16.687425 |
| C | 15.292442 | -0.899661 | 17.989141 |
| C | 20.229067 | -0.649569 | 20.291677 |
| C | 17.977159 | -1.286448 | 20.286841 |
| C | 18.893904 | -0.215678 | 20.620925 |
| C | 18.516841 | 1.095923  | 20.418263 |
| C | 22.867298 | 0.208312  | 15.459341 |

|   |           |           |           |
|---|-----------|-----------|-----------|
| C | 21.195533 | 0.261261  | 19.796843 |
| C | 22.822644 | 0.514424  | 17.919488 |
| C | 22.464931 | 1.835257  | 17.746759 |
| C | 22.360638 | 2.393119  | 16.431641 |
| C | 22.477566 | 1.600088  | 15.263797 |
| C | 21.698058 | 1.990502  | 14.078118 |
| C | 21.304597 | 0.976284  | 13.104815 |
| C | 20.141468 | 1.148700  | 12.323676 |
| C | 19.272352 | 0.026034  | 12.004672 |
| C | 17.909385 | 0.461093  | 12.090014 |
| C | 19.458354 | 2.042224  | 19.879338 |
| C | 20.797543 | 1.660818  | 19.596769 |
| C | 21.448881 | 2.422270  | 18.597773 |
| C | 20.745438 | 3.385226  | 17.818023 |
| C | 21.373556 | 3.434430  | 16.522376 |
| C | 20.643938 | 3.791068  | 15.432556 |
| C | 20.876426 | 3.139486  | 14.166073 |
| C | 19.664230 | 3.267289  | 13.411063 |
| C | 19.305891 | 2.294043  | 12.498213 |
| C | 17.924815 | 1.872806  | 12.383710 |
| C | 16.970790 | 2.422182  | 13.215541 |
| C | 15.949147 | 1.588014  | 13.792071 |
| C | 15.872271 | 0.204381  | 13.478662 |
| C | 14.902811 | -0.091577 | 15.739718 |
| C | 15.501367 | 0.464806  | 18.439226 |
| C | 16.319448 | 0.383984  | 19.603421 |
| C | 17.210587 | 1.403483  | 19.881116 |
| C | 17.345964 | 2.495825  | 18.966292 |
| C | 18.733634 | 2.930709  | 19.025872 |
| C | 19.341882 | 3.570772  | 17.936453 |

|    |           |           |           |
|----|-----------|-----------|-----------|
| C  | 18.535140 | 3.864634  | 16.752417 |
| C  | 19.232024 | 4.108277  | 15.550381 |
| C  | 18.653829 | 3.853304  | 14.272799 |
| C  | 17.343715 | 3.419584  | 14.192850 |
| C  | 16.604280 | 3.172060  | 15.392841 |
| C  | 15.689401 | 2.075948  | 15.110220 |
| C  | 15.224581 | 1.235632  | 16.131996 |
| C  | 15.616777 | 1.521500  | 17.511729 |
| C  | 16.596653 | 2.579749  | 17.779898 |
| C  | 17.160926 | 3.357351  | 16.670310 |
| C  | 18.756122 | 0.361087  | 17.017280 |
| C  | 18.533489 | 0.642917  | 15.818476 |
| Th | 19.913515 | -1.279330 | 15.760111 |

- 1 M. Jin, J. Zhuang, Y. Wang, W. Yang, X. Liu and N. Chen, *Inorg. Chem.*, 2019, **58**, 16722-16726.
- 2 W. Cai, L. Abella, J. Zhuang, X. Zhang, L. Feng, Y. Wang, R. Morales-Martinez, R. Esper, M. Boero, A. Metta-Magana, A. Rodriguez-Forteza, J. M. Poblet, L. Echegoyen and N. Chen, *J. Am. Chem. Soc.*, 2018, **140**, 18039-18050.
- 3 Y. Yan, R. Morales-Martinez, J. Zhuang, Y. R. Yao, X. Li, J. M. Poblet, A. Rodriguez-Forteza and N. Chen, *Chem Commun (Camb)*, 2021, **57**, 6624-6627.
- 4 Y. Wang, R. Morales-Martinez, X. Zhang, W. Yang, Y. Wang, A. Rodriguez-Forteza, J. M. Poblet, L. Feng, S. Wang and N. Chen, *J. Am. Chem. Soc.*, 2017, **139**, 5110-5116.
- 5 Q. Meng, R. Morales-Martinez, J. Zhuang, Y. R. Yao, Y. Wang, L. Feng, J. M. Poblet, A. Rodriguez-Forteza and N. Chen, *Inorg. Chem.*, 2021, **60**, 11496-11502.
- 6 Y. Wang, R. Morales-Martinez, W. Cai, J. Zhuang, W. Yang, L. Echegoyen, J. M. Poblet, A. Rodriguez-Forteza and N. Chen, *Chem Commun (Camb)*, 2019, **55**, 9271-9274.
- 7 J. Xin, F. Jin, R. Guan, M. Chen, X.-M. Xie, Q. Zhang, S.-Y. Xie and S. Yang, *Inorg. Chem. Front.*, 2021, **8**, 1719-1726.
- 8 W. Shen, Z. Hu, P. Yu, Z. Wei, P. Jin, Z. Shi and X. Lu, *Inorg. Chem. Front.*, 2020, **7**, 4563-4571.
- 9 F. Liu, S. Wang, C.-L. Gao, Q. Deng, X. Zhu, A. Kostanyan, R. Westerström, F. Jin, S.-Y. Xie, A. A. Popov, T. Greber and S. Yang, *Angew. Chem. Int. Ed.*, 2017, **56**, 1830-1834.
- 10 R. Guan, M. Chen, J. Xin, X.-M. Xie, F. Jin, Q. Zhang, S.-Y. Xie and S. Yang, *J. Am. Chem. Soc.*, 2021, **143**, 8078-8085.
